# Supplementary material
Source: PubMed Central journal article supplement (PMC9448003)
Supplement: JCOPDF-9-309-s001.pdf [file JCOPDF-9-309-s001.pdf]

## **Online Supplement**

### **Differences of the Nasal Microbiome and Mycobiome by Clinical Characteristics of COPD Patients**

Maura Alvarez-Baumgartner,<sup>1</sup> Chengchen Li,<sup>2</sup> Thomas Kuntz,<sup>2</sup> Lina Nurhussien,<sup>1</sup> Andrew J. Synn,<sup>1</sup> Wendy Y. Sun,<sup>1</sup> Jennifer E. Kang,<sup>1</sup> Peggy Lai,<sup>3</sup> Jeremy E. Wilkinson,<sup>2</sup> Mary B. Rice<sup>1</sup>

<sup>1</sup>Department of Medicine, Beth Israel Deaconess Medical Center, Boston, Massachusetts, United States

<sup>2</sup>Department of Biostatistics, Harvard T.H. Chan School of Public Health, Boston, Massachusetts, United States

<sup>3</sup>Department of Medicine, Massachusetts General Hospital, Boston, Massachusetts, United States

#### ***Address correspondence to:***

Mary B. Rice

Phone: (617) 667-5864

Email: [mrice1@bidmc.harvard.edu](mailto:mrice1@bidmc.harvard.edu)

**eFigure 1:** Heatmap of log<sub>10</sub> relative abundances of the top 30 genera in samples, clustered based on similar nasal bacterial compositions, and annotated with sample type. Samples (columns) and taxa (rows) are sorted based on Bray-Curtis dissimilarities and Euclidean distances, respectively. Genera were assigned according to the SILVA reference database.

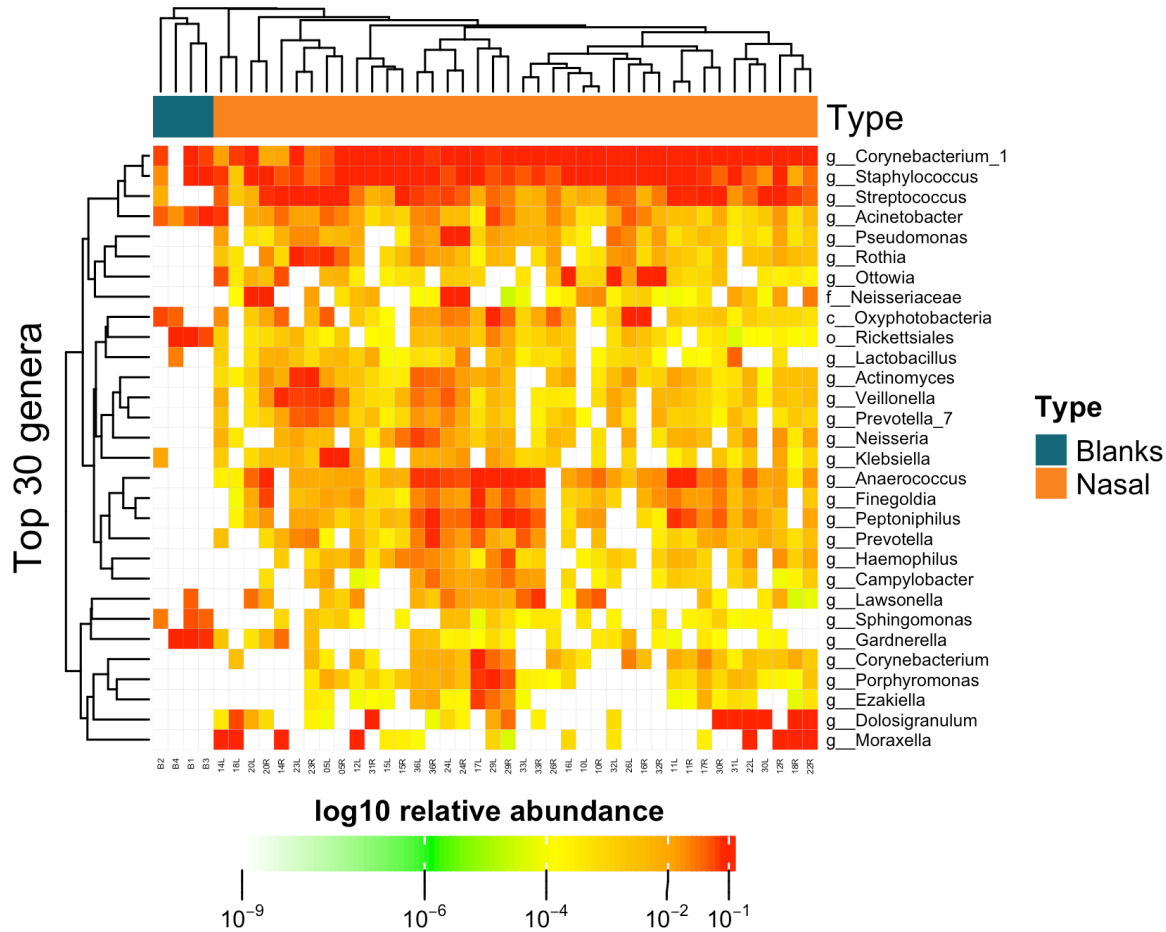

**eFigure 2: Bacterial beta diversity comparisons among the 24 samples collected from the 6 volunteers, color coded by Participant # (Subject\_ID) and labeled by sampling method (nasosorption vs nasal swab).** The proportion of variance explained by each principal coordinate is denoted in the corresponding axis label. In the PERMANOVA on the Bray-Curtis Dissimilarity, individual participant contributed to variation in microbial community structure ( $R^2 = 0.676$ ,  $p = 0.001$ ), but nare (left vs right,  $R^2 = 0.05$ ,  $p = 0.894$ ) and sampling method ( $R^2 = 0.015$ ,  $p = 0.366$ ) did not.

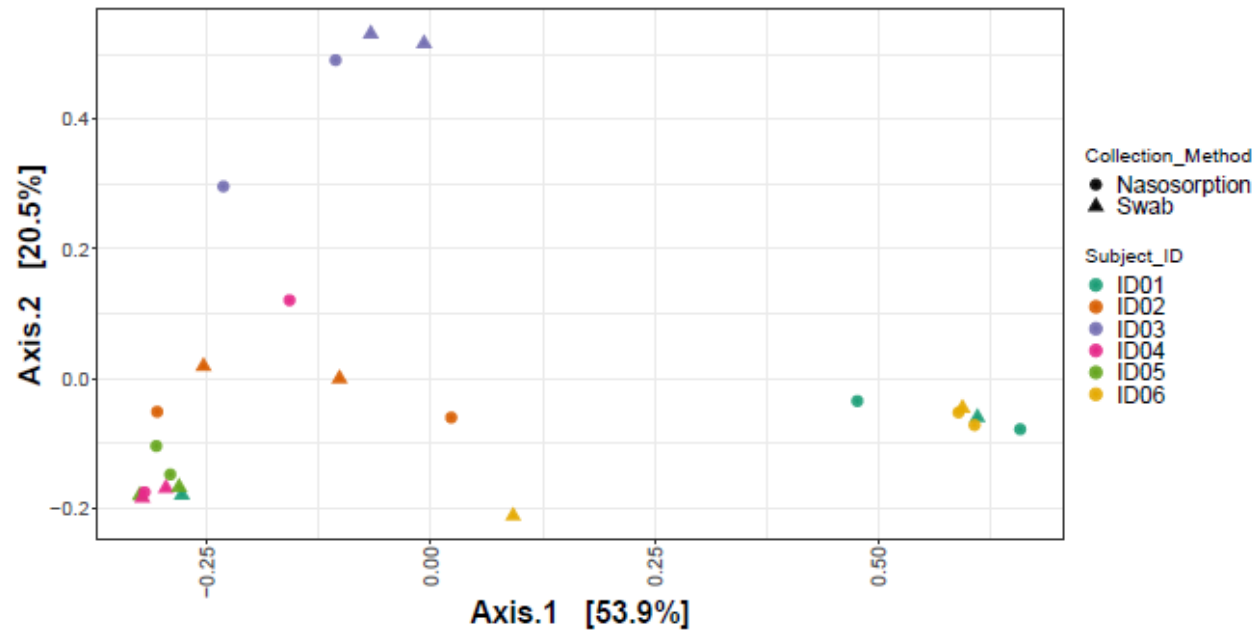

**eFigure 3:** Percentage of variance in bacterial taxonomy explained by each clinical characteristic, adjusting only for within-participant effects. Each PERMANOVA  $R^2$  is reported in white color text and the number of participants included in each test is shown in square brackets. Individual test statistical significance p-values are listed in black color text. FDR-corrected statistical significance is noted as follows: FDR \*  $P \leq 0.05$ , .  $P \leq 0.1$ .

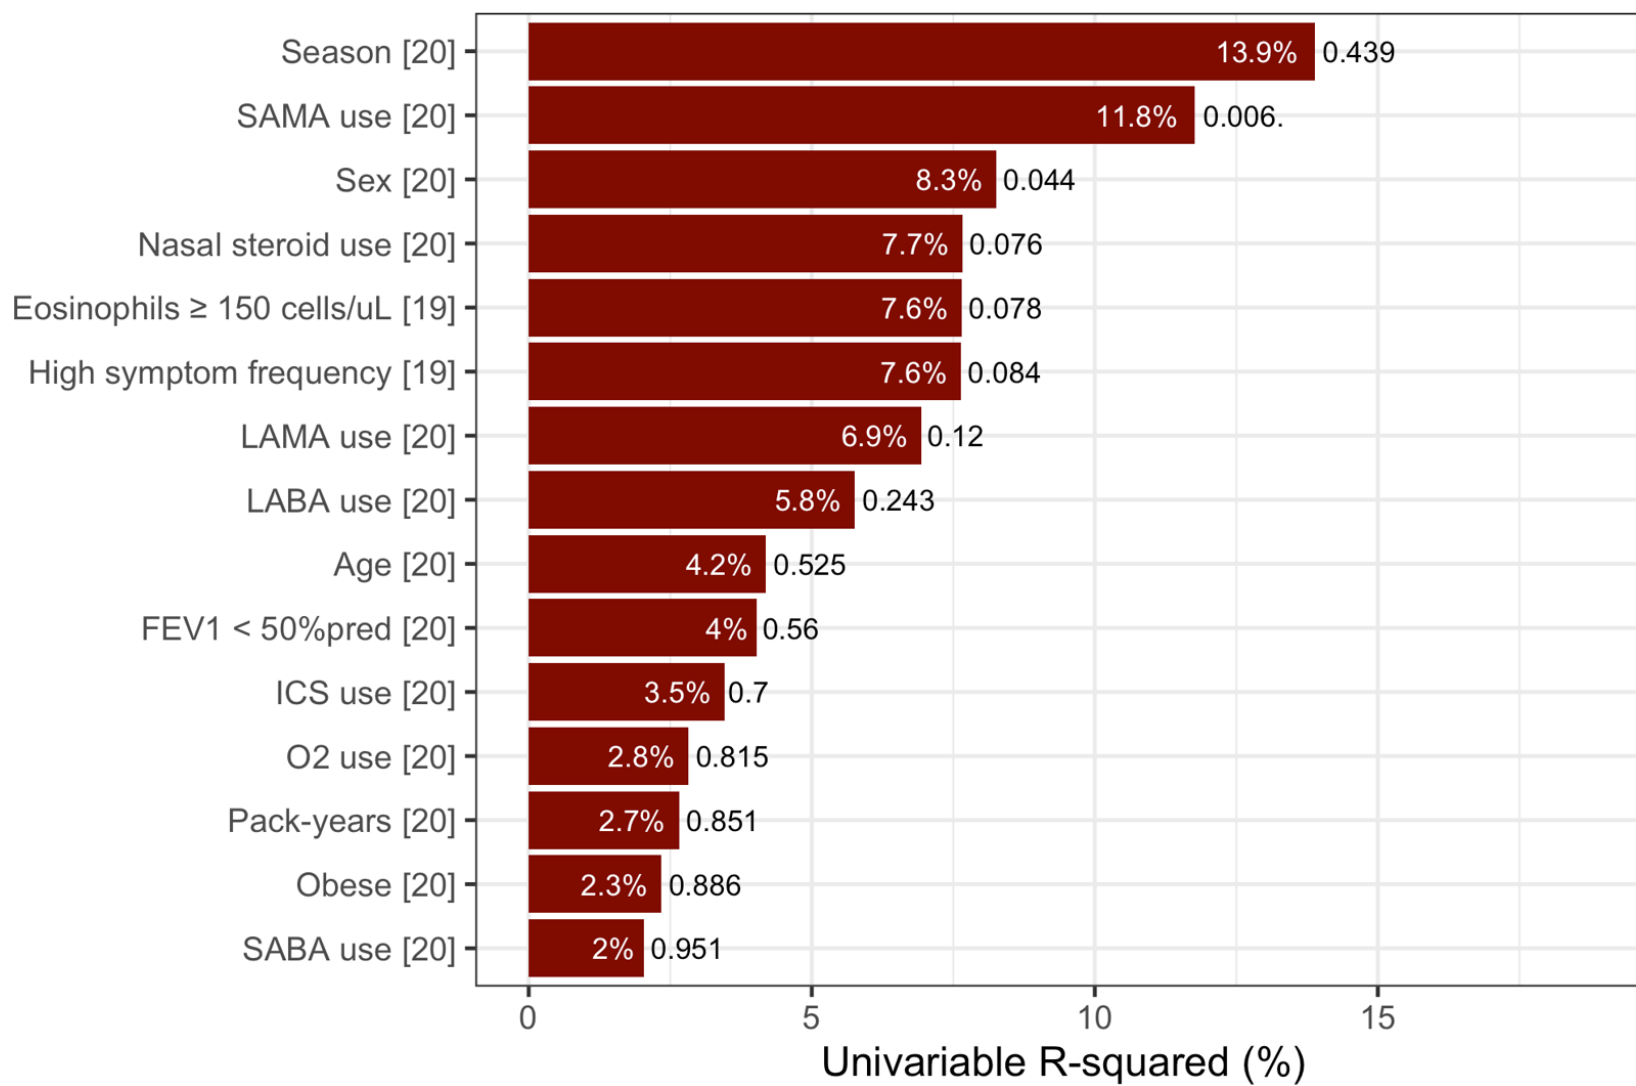



**eFigure 4:** Heatmap of log<sub>10</sub> relative abundances of the top 30 genera in samples, clustered based on similar nasal fungal compositions, and annotated with sample type. Samples (columns) and taxa (rows) are sorted based on Bray-Curtis dissimilarities and Euclidean distances, respectively. Genera were assigned according to the UNITE reference database.

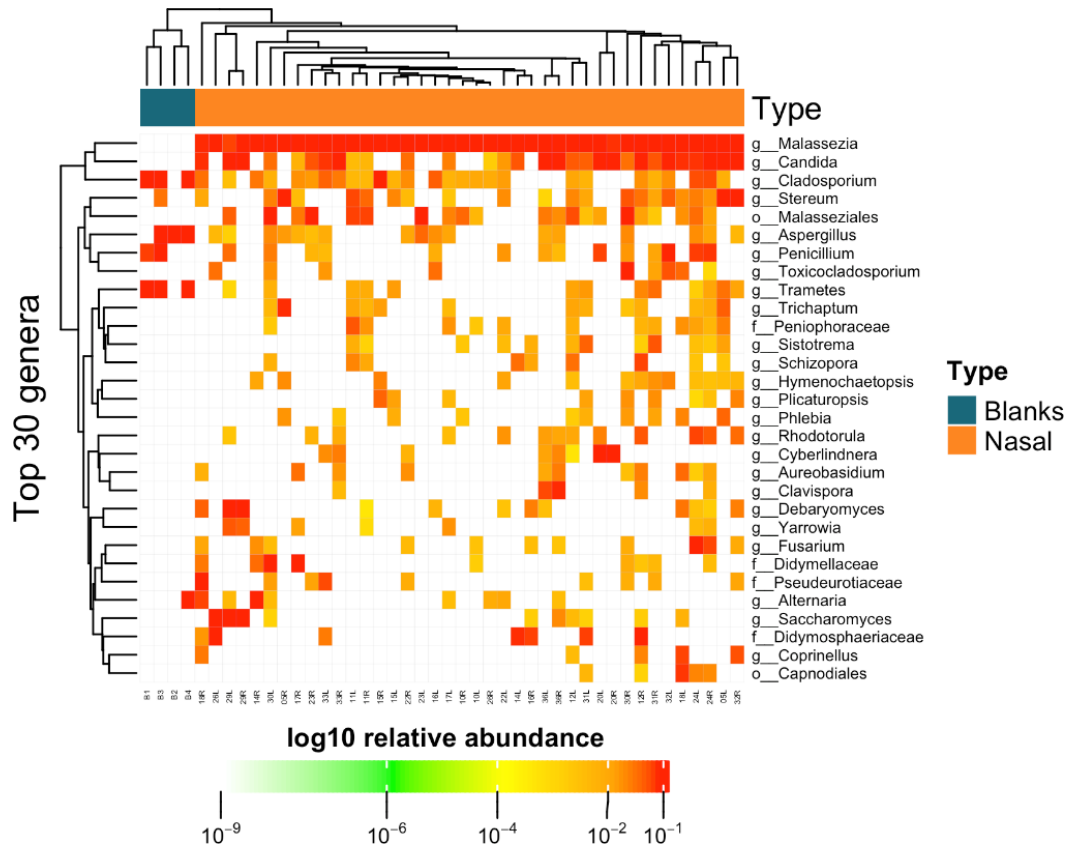





**eFigure 5:** Percentage of variance in fungal taxonomy explained by each clinical characteristic, adjusting only for within-participant effects. Each PERMANOVA  $R^2$  is reported in white color text and the number of participants included in each test is shown in square brackets. Individual test statistical significance p-values are listed in black color text. FDR-corrected statistical significance is noted as follows: FDR \*  $P \leq 0.05$ , .  $P \leq 0.1$ .

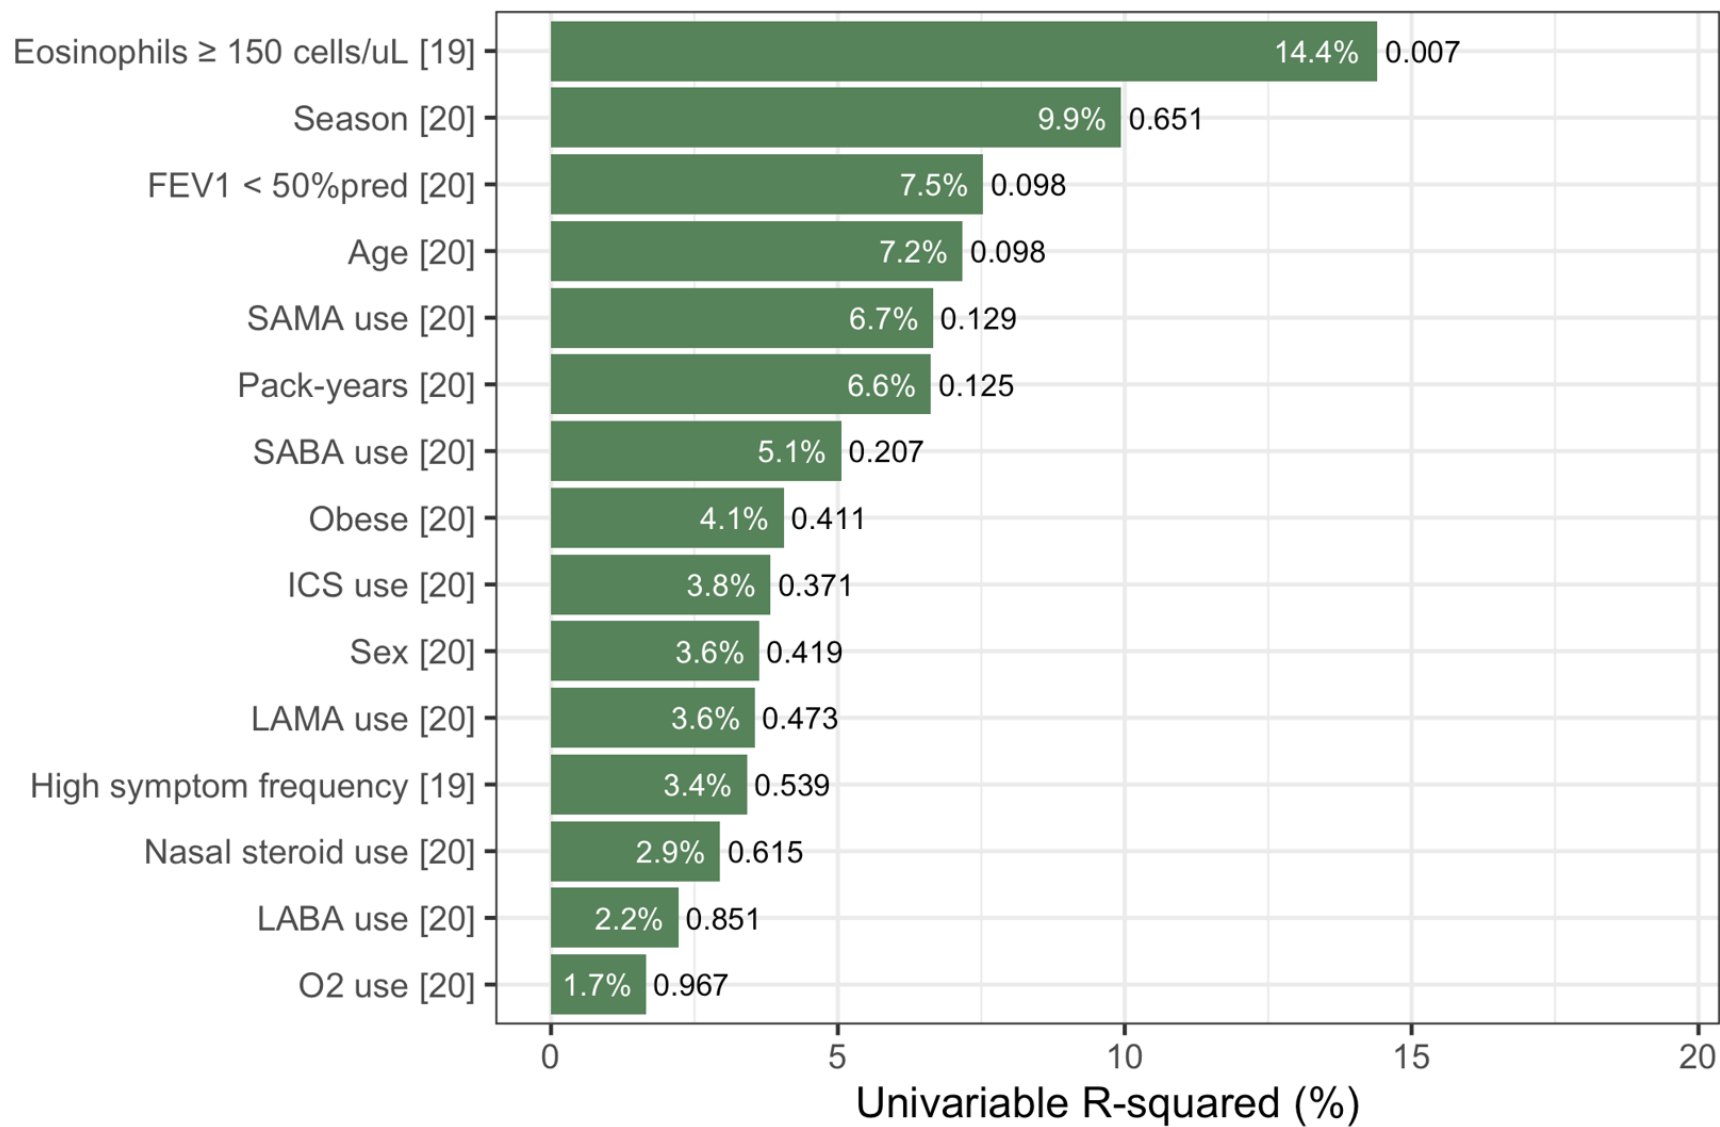

**eTable 1: Bacterial Genera Identified on both Blank and Nasal Samples**  
(among top 30 genera in nasal samples)

| <b>Bacterial Taxa</b> | <b>Evidence of presence in nasal cavity</b> |
|-----------------------|---------------------------------------------|
| g__Corynebacterium_1  | 1-4,6                                       |
| g__Staphylococcus     | 1-4,6                                       |
| g__Streptococcus      | 1-4,6                                       |
| g__Acinetobacter      | 1,3,5                                       |
| g__Klebsiella         | 1                                           |
| g__Lawsonella         | 6                                           |
| c__Oxyphotobacteria   | *                                           |

\* Oxyphotobacteria has been reported in samples taken from the indoor environment, soil and air (7-9). We did not identify published studies reporting its presence in the nasal cavity.

**References for eTable 1:**

1. Mahdavinia M ., Keshavarzian A, Tobin MC, Landay AL, Schleimer RP. A comprehensive review of the nasal microbiome in chronic rhinosinusitis (CRS). *Clin Exp Allergy*. 2016;46(1):21-41.
2. de Boeck I, Wittouck S, Martens K, et al. Anterior Nares Diversity and Pathobionts Represent Sinus Microbiome in Chronic Rhinosinusitis. *mSphere*. 2019;4(6).

3. de Steenhuijsen Piters, W.A.A. J, Mitsi E. Interaction between the nasal microbiota and *S. pneumoniae* in the context of live-attenuated influenza vaccine. *Nat Commun* . 2019;10(2981).
4. Bomar L, Brugger SD, Lemon KP. Bacterial microbiota of the nasal passages across the span of human life. *Curr Opin Microbiol*. 2018;41:8-14.
5. Liou ML, Chen KH, Yeh HL, Lai CY, Chen CH. Persistent nasal carriers of *Acinetobacter baumannii* in long-term-care facilities. *Am J Infect Control*. 2017;45(7):723-727.
6. Escapa IF, Chen T, Huang Y, Gajare P, Dewhirst FE. New Insights into Human Nostril Microbiome from the Expanded Human Oral Microbiome Database (eHOMD): a Resource for the Microbiome of the Human Aerodigestive Tract. *mSystems*. 2018;3(6):e00187-18.
7. Fu X, Norbäck D, Yuan Q, et al. Indoor microbiome, environmental characteristics and asthma among junior high school students in Johor Bahru, Malaysia. *Environ Int*. 2020;138:105664.
8. Sibanda T, Selvarajan R, Ogola HJ, Obieze CC, Tekere M. Distribution and comparison of bacterial communities in HVAC systems of two university buildings: Implications for indoor air quality and public health. *Environ Monit Assess*. 2021;193(1):47.
9. Stewart JD, Kremer P, Shakya KM, Conway M, Saad A. Outdoor Atmospheric Microbial Diversity is Associated with Urban Landscape Structure and Differs from Indoor-Transit Systems as Revealed by Mobile Monitoring and Three-Dimensional Spatial Analysis. *Front Ecol Evol*. February 2021
